# Supplementary material for: Opposing functions of the plant TOPLESS gene family during SNC1-mediated autoimmunity
Source: PLoS Genet. 2021 Feb 23;17(2):e1009026. doi: 10.1371/journal.pgen.1009026 (PMC7935258; doi:10.1371/journal.pgen.1009026)
Supplement: S3 Data — (XLSX) [file pgen.1009026.s012.xlsx]

## Sheet: tpr2, 3, 2_3
Plant	Col-0				tpr2-2				tpr3-1				tpr2-2/tpr3-1
Day	Day 0	Day 3			Day 0	Day 3			Day 0	Day 3			Day 0	Day 3
Clone	DC3000	DC3000	Dilution		DC3000	DC3000	Dilution		DC3000	DC3000	Dilution		DC3000	DC3000	Dilution
Colonies
	17	85	4		17	19	4		11	13	4		12	26	4
	16	65	4		7	52	4		6	39	4		10	27	4
	14	56	4		15	10	4		13	25	4		9	8	4
	35	19	4		96	6	5		109	56	4		176	47	4
	23	52	4		76	11	4		71	19	4		217	67	4
	28	63	4		92	20	4		102	2	4		258	38	4
cfu	0	0			0	0			0	0			0	0
	136	17000000			136	3800000			88	2600000			96	5200000
	128	13000000			56	10400000			48	7800000			80	5400000
	112	11200000			120	2000000			104	5000000			72	1600000
	280	3800000			768	12000000			872	11200000			1408	9400000
	184	10400000			608	2200000			568	3800000			1736	13400000
	224	12600000			736	4000000			816	400000			2064	7600000
log
	2.13354	7.23045			2.13354	6.57978			1.94448	6.41497			1.98227	6.716
	2.10721	7.11394			1.74819	7.01703			1.68124	6.89209			1.90309	6.73239
	2.04922	7.04922			2.07918	6.30103			2.01703	6.69897			1.85733	6.20412
	2.44716	6.57978			2.88536	7.07918			2.94052	7.04922			3.1486	6.97313
	2.26482	7.01703			2.7839	6.34242			2.75435	6.57978			3.23955	7.1271
	2.35025	7.10037			2.86688	6.60206			2.91169	5.60206			3.31471	6.88081
Average	2.22537	7.01513			2.41618	6.65359			2.37489	6.53952			2.57426	6.77226
STDEV	0.141283	0.205785			0.446868	0.300678			0.507697	0.466456			0.662778	0.290283

## Sheet: tpr2, 3, 2_3 Chart
Plant	Day	Average	STDEV		T-test to Col-0		Combined Data
Col-0	Day 0	2.22537	0.141283
	Day 3	7.01513	0.205785		1
tpr2-2	Day 0	2.41618	0.446868
	Day 3	6.65359	0.300678		0.0507946
tpr3-1	Day 0	2.37489	0.507697
	Day 3	6.53952	0.466456		0.0635544
tpr2-2/tpr3-1	Day 0	2.57426	0.662778
	Day 3	6.77226	0.290283		0.157933

## Sheet: snc1-11 tpr2_3
Plant	Col-0				snc1-11				srfr1-4/snc1-11				snc1-11/tpr2-2/tpr3-1				srfr1-4/snc1-11/tpr2-2/tpr3-1
Day	Day 0	Day 3			Day 0	Day 3			Day 0	Day 3			Day 0	Day 3			Day 0	Day 3
Clone	DC3000	DC3000	Dilution		DC3000	DC3000	Dilution		DC3000	DC3000	Dilution		DC3000	DC3000	Dilution		DC3000	DC3000	Dilution
Colonies
	17	85	4		11	14	4		22	64	3		20	96	4		29	70	3
	16	65	4		12	17	4		18	12	4		16	42	4		26	20	4
	14	56	4		16	35	4		20	33	4		14	123	4		32	29	4
	5	71	4		21	53	4		9	118	2		9	341	4		6	248	3
	5	129	4		8	150	4		7	189	3		15	125	4		11	123	3
	8	65	4		13	27	5		4	121	3		8	118	4		8	121	3
cfu	0	0			0	0			0	0			0	0			0	0
	136	17000000			88	2800000			176	1280000			160	19200000			232	1400000
	128	13000000			96	3400000			144	2400000			128	8400000			208	4000000
	112	11200000			128	7000000			160	6600000			112	24600000			256	5800000
	40	14200000			168	10600000			72	236000			72	68200000			48	4960000
	40	25800000			64	30000000			56	3780000			120	25000000			88	2460000
	64	13000000			104	54000000			32	2420000			64	23600000			64	2420000
log
	2.13354	7.23045			1.94448	6.44716			2.24551	6.10721			2.20412	7.2833			2.36549	6.14613
	2.10721	7.11394			1.98227	6.53148			2.15836	6.38021			2.10721	6.92428			2.31806	6.60206
	2.04922	7.04922			2.10721	6.8451			2.20412	6.81954			2.04922	7.39094			2.40824	6.76343
	1.60206	7.15229			2.22531	7.02531			1.85733	5.37291			1.85733	7.83378			1.68124	6.69548
	1.60206	7.41162			1.80618	7.47712			1.74819	6.57749			2.07918	7.39794			1.94448	6.39094
	1.80618	7.11394			2.01703	7.73239			1.50515	6.38382			1.80618	7.37291			1.80618	6.38382
Average	1.88338	7.17858			2.01375	7.00976			1.95311	6.27353			2.01721	7.36719			2.08728	6.49697
STDEV	0.225249	0.117459			0.130625	0.467842			0.27156	0.456954			0.140235	0.265349			0.288083	0.211577

## Sheet: snc1-11 tpr2_3 Chart
	Av		SD
	Day 0	Day 3	Day 0	Day 3
Col-0	1.88338	7.17858	0.225249	0.117459
snc1-11	2.01375	7.00976	0.130625	0.467842
srfr1-4/snc1-11	1.95311	6.27353	0.27156	0.456954
snc1-11/tpr2-2/tpr3-1	2.01721	7.36719	0.140235	0.265349
srfr1-4/snc1-11/tpr2-2/tpr3-1	2.08728	6.49697	0.288083	0.211577
a ab	c	a	bc
