# Supplementary material for: Opposing functions of the plant TOPLESS gene family during SNC1-mediated autoimmunity
Source: PLOS journal article supplement (doi:10.1371/journal.pgen.1009026), 2021-02-23
Supplement: S4 (10.1371/journal.pgen.1009026.s004) [file journal.pgen.1009026.s004]

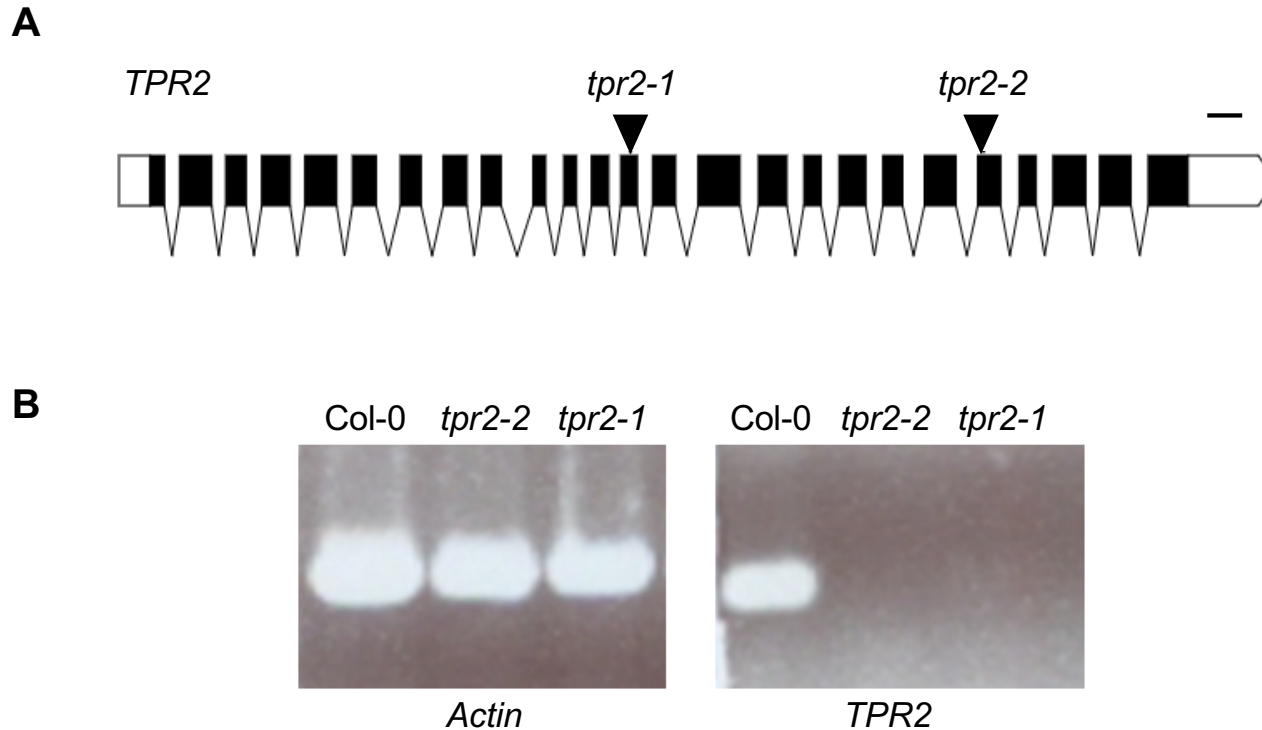

**S4 Fig. Molecular characterization of *tpr2* T-DNA insertion alleles**

(A) T-DNA insertion locations for *tpr2-1* (SALK\_112730) in exon 13, and *tpr2-2* (SALK\_079848) in exon 21. Scale bar is 200 bp. (B) RT-PCR using *TPR2* primers on the 3' side of the T-DNA insertions in *tpr2-1* and *tpr2-2* after 33 cycles. *Actin* was used as a control for quality of RNA and efficiency of reverse transcription. *TPR2* primers used were *TPR2* cDNA For4 (S2 Table) in exon 21 and *TPR2-2* LP (S1 Table) in exon 24.
