# Supplementary material for: Opposing functions of the plant TOPLESS gene family during SNC1-mediated autoimmunity
Source: PLOS journal article supplement (doi:10.1371/journal.pgen.1009026), 2021-02-23
Supplement: S5 (10.1371/journal.pgen.1009026.s005) [file journal.pgen.1009026.s005]

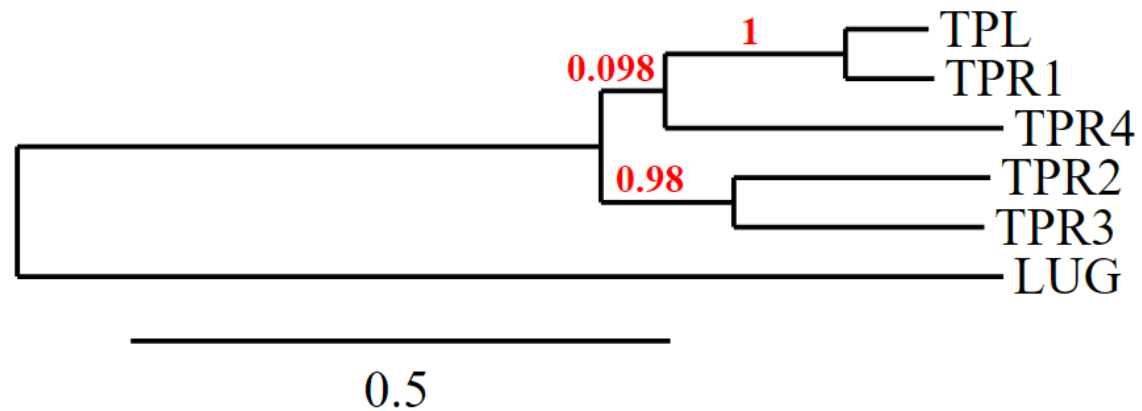

**S5 Fig. Phylogenetic tree of the Arabidopsis TOPLESS family**

Phylogram showing evolutionary relationships amongst *TOPLESS* family members. The WD40 protein *LEUNIG* (*LUG*) is included as the outgroup. Tree was generated from full length cDNA sequences using [www.phylogeny.fr](http://www.phylogeny.fr).
